# Supplementary material for: High specific capacity and mechanism of a metal–organic framework based cathode for aqueous zinc-ion batteries
Source: Royal Society of Chemistry journal article supplement (doi:10.1039/d2ya00257d), 2022-01-01
Supplement: d2ya00257d1.pdf [file d2ya00257d1.pdf]

**Supporting Information for**  
**High Specific Capacity and Mechanism of a Metal-organic Framework Based**  
**Cathode for Aqueous Zinc-ion Batteries**

Wenshan Gou<sup>a</sup>, Hao Chen<sup>b</sup>, Zhao Xu<sup>a</sup>, Yifei Sun<sup>a</sup>, Xuguang Han<sup>a</sup>, Mengmeng Liu<sup>a</sup>,  
Yan Zhang<sup>a\*</sup>

<sup>a</sup> Institute of Advanced Cross-field Science, College of Life Sciences, Qingdao  
University, Qingdao 200671, P. R. China. Email: yzhang\_iacs@qdu.edu.cn

<sup>b</sup> School of Materials and Energy, Southwest University, Chongqing, 400715, P. R.  
China.

\* The corresponding author. Email: yzhang\_iacs@qdu.edu.cn

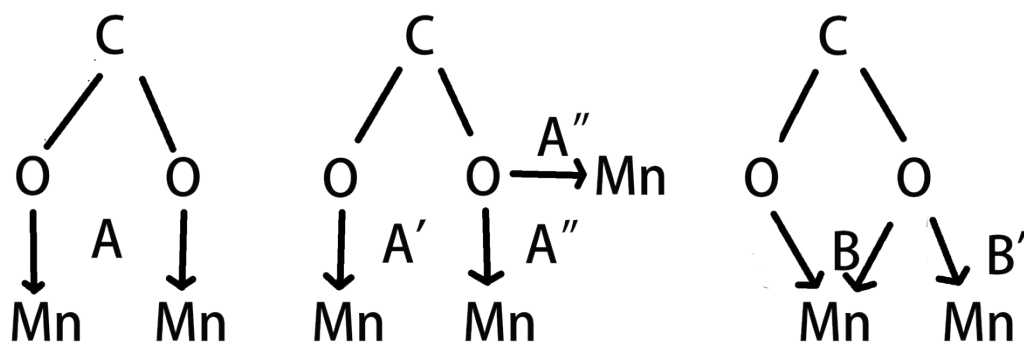

**Fig. S1.** The different modes of Mn-O-C rods (carboxylate links are coordinated to the metal centers).

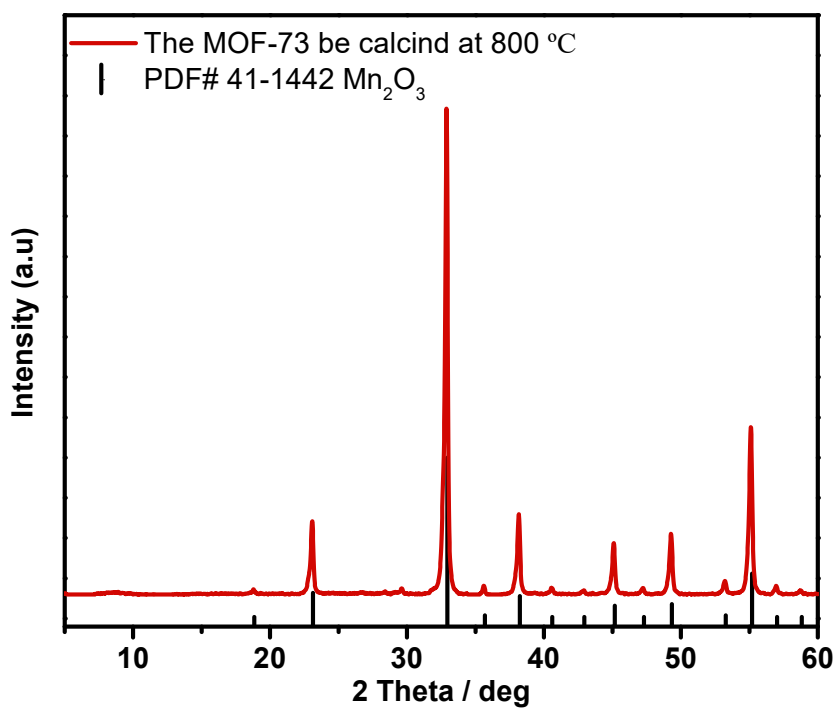

**Fig. S2.** The XRD pattern of MOF-73 after calcine at 800°C in air.

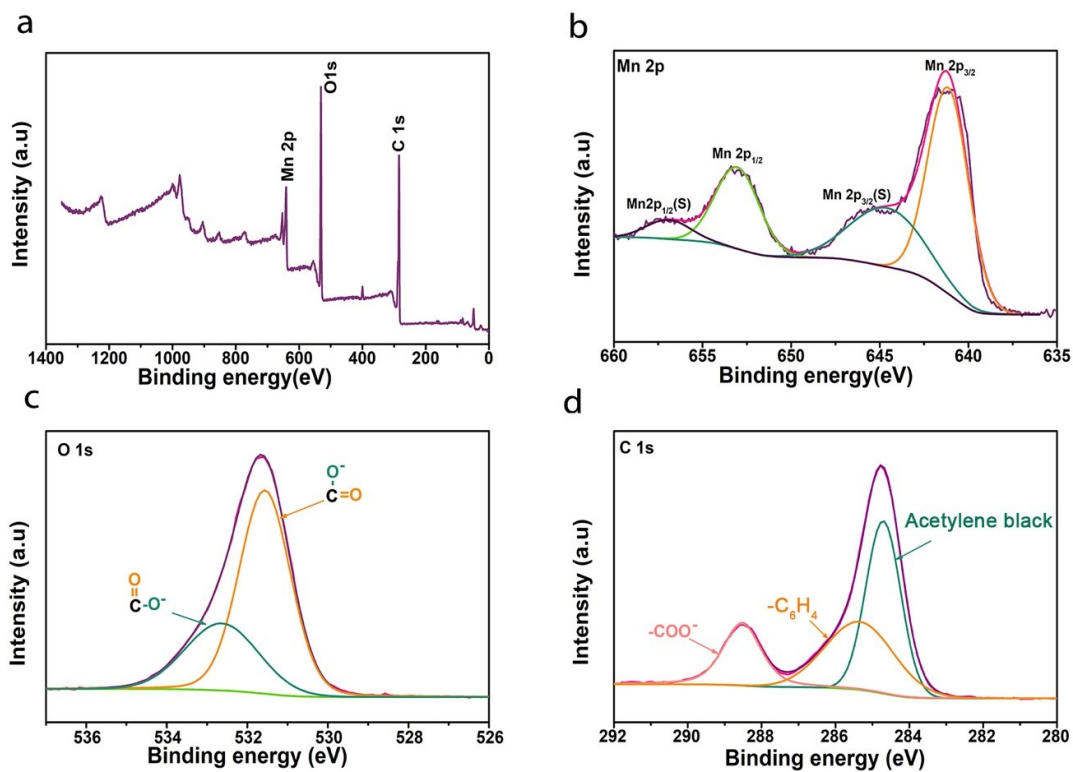

**Fig. S3.** XPS survey spectra (a) of the as-prepared MOF-73 and narrow spectra for Mn 2p (b) O 1s (c) and C 1s (d).

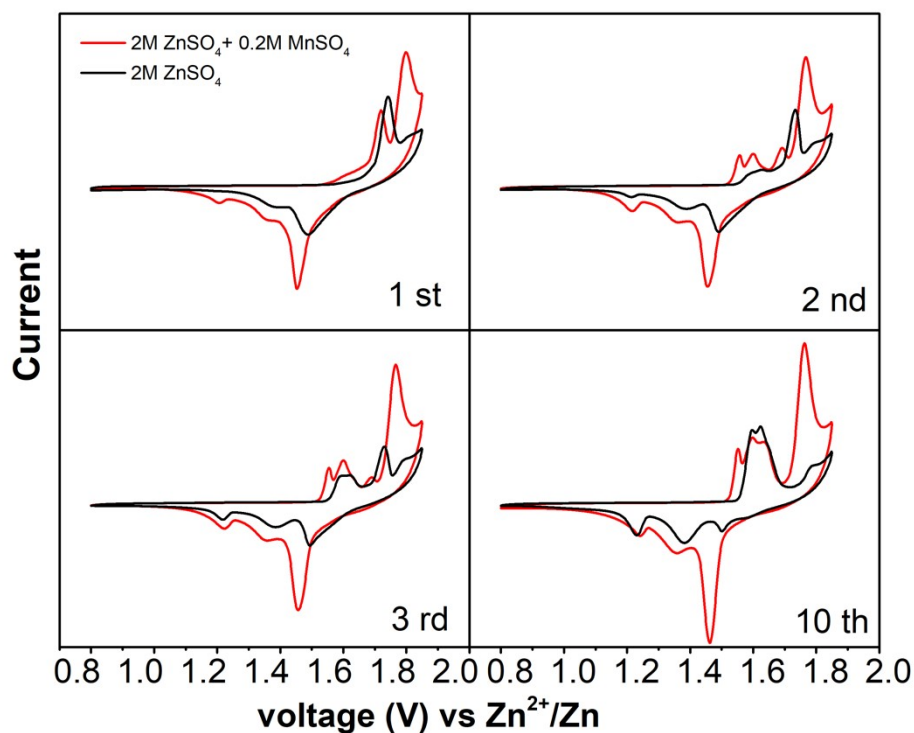

**Fig. S4.** The CV curves of ZIBs with or without MnSO<sub>4</sub> added.

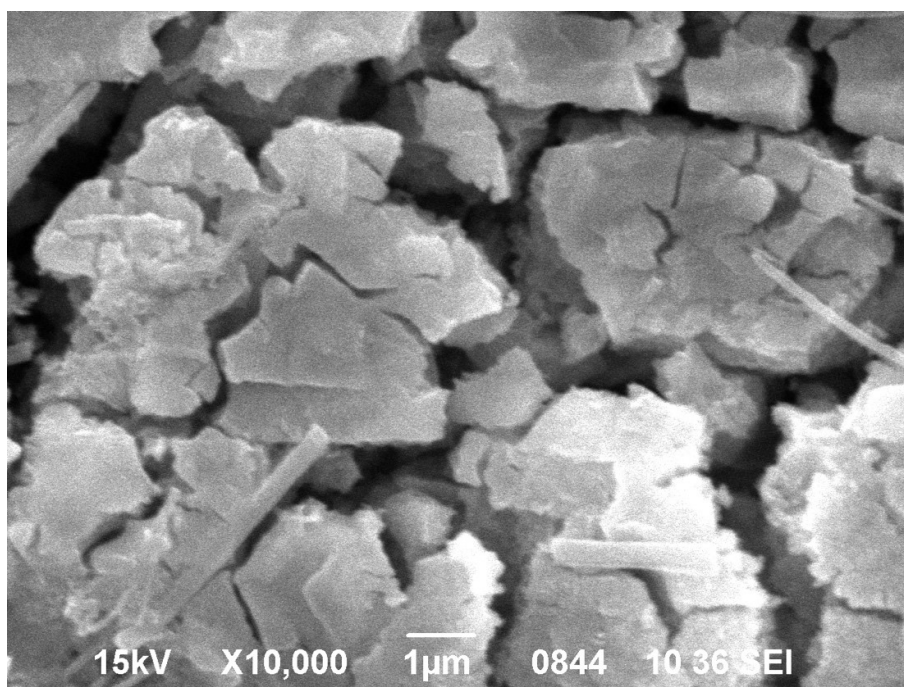

Fig. S5. The SEM of cathode at original state.

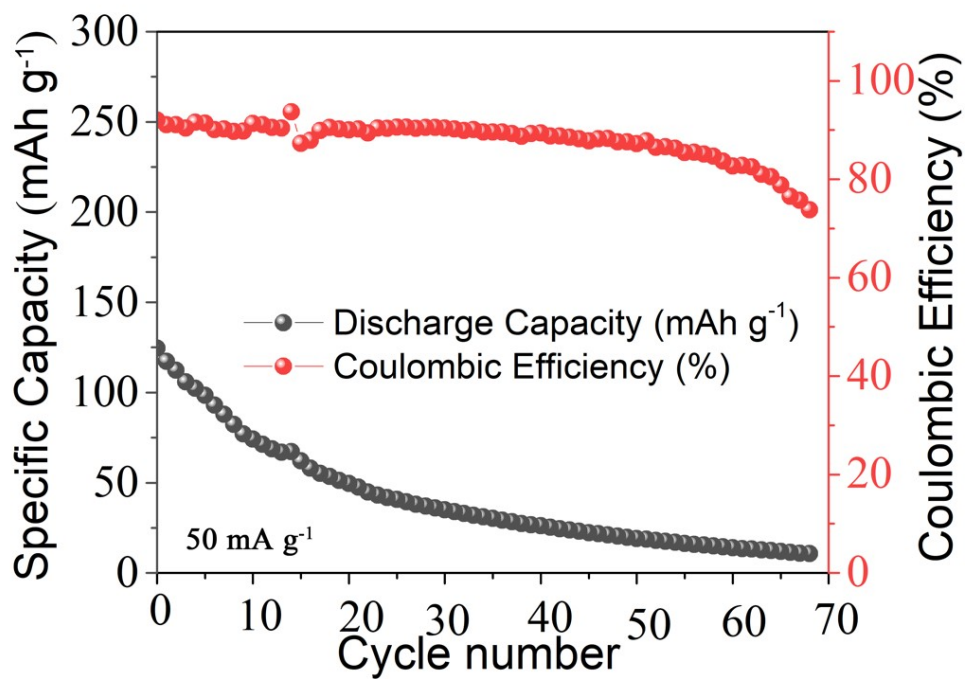

Fig. S6. The cycle performance of other carbon ZIBs with 0.2M MnSO<sub>4</sub> added.

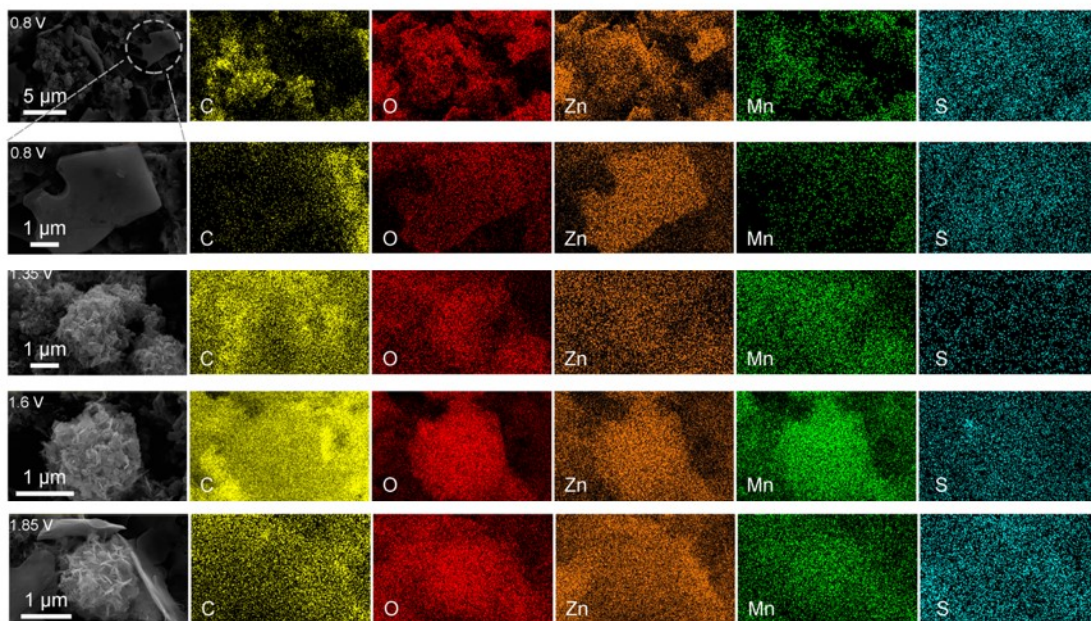

**Fig S7.** The EDS mapping of cathode at different charge/discharge states.

| Electrode materials                                  | Electrolyte                                                                     | Current density<br>(A g <sup>-1</sup> )       | Specific capacity<br>(mA h g <sup>-1</sup> )     |
|------------------------------------------------------|---------------------------------------------------------------------------------|-----------------------------------------------|--------------------------------------------------|
| MnO <sub>2</sub> /PAN [1]                            | 2 M ZnSO <sub>4</sub> + 0.1 M MnSO <sub>4</sub>                                 | 0.2<br>(0.4 mA cm <sup>-2</sup> )             | 280<br>(0.56 mA h cm <sup>-2</sup> )             |
| N-CNSs@MnO <sub>2</sub> [2]                          | 2 M ZnSO <sub>4</sub> + 0.2 M MnSO <sub>4</sub>                                 | 0.2<br>(0.46 mA cm <sup>-2</sup> )            | 303<br>(0.69 mA h cm <sup>-2</sup> at)           |
| Mn <sub>3</sub> O <sub>4</sub> [3]                   | 2 M ZnSO <sub>4</sub> + 0.2 M MnSO <sub>4</sub>                                 | 0.1<br>(0.2 mA cm <sup>-2</sup> )             | 221<br>(0.44 mA h cm <sup>-2</sup> at)           |
| MnO [4]                                              | 1M ZnSO <sub>4</sub> + 1 M MnSO <sub>4</sub>                                    | (0.2 mA cm <sup>-2</sup> )                    | 0.325 mA h cm <sup>-2</sup>                      |
| γ - MnO <sub>2</sub> /graphene [5]                   | 2 M ZnSO <sub>4</sub> + 0.2 M MnSO <sub>4</sub>                                 | 2<br>(1 mA cm <sup>-2</sup> )                 | 301<br>(0.6 mA h cm <sup>-2</sup> )              |
| δ-MnO <sub>2</sub> [6]                               | 2 M ZnSO <sub>4</sub> + 0.2 M MnSO <sub>4</sub>                                 | 0.308<br>(0.62 mA cm <sup>-2</sup> )          | 278<br>(0.55 mA h cm <sup>-2</sup> )             |
| MnO <sub>2</sub> /Co <sub>3</sub> O <sub>4</sub> [7] | 2 M ZnSO <sub>4</sub> + 0.2 M MnSO <sub>4</sub>                                 | 0.5<br>(1.25 mA cm <sup>-2</sup> )            | 250<br>(0.62 mA h cm <sup>-2</sup> )             |
| β-MnO <sub>2</sub> nanorod [8]                       | 3 M ZnSO <sub>4</sub> + 0.2 M MnSO <sub>4</sub>                                 | 0.0308<br>(0.077 mA cm <sup>-2</sup> )        | 288<br>(0.72 mA h cm <sup>-2</sup> )             |
| β-MnO <sub>2</sub> [9]                               | 2 M ZnSO <sub>4</sub> + 0.5 M MnSO <sub>4</sub>                                 | 0.1<br>(0.1 mA cm <sup>-2</sup> )             | 300<br>(0.3 mA h cm <sup>-2</sup> )              |
| Polyfurfural/MnO <sub>2</sub> [10]                   | 1 M Zn(CF <sub>3</sub> SO <sub>3</sub> ) <sub>2</sub> + 0.1 M MnSO <sub>4</sub> | 0.2<br>(0.4 mA cm <sup>-2</sup> )             | 275<br>(0.55 mA h cm <sup>-2</sup> )             |
| D-β-MnO <sub>2</sub> [11]                            | 2 M ZnSO <sub>4</sub>                                                           | 0.05<br>(0.6 mA cm <sup>-2</sup> )            | 305<br>(0.60 mA h cm <sup>-2</sup> )             |
| MnO <sub>2</sub> -Ce [12]                            | 2 M ZnSO <sub>4</sub> + 0.1 M MnSO <sub>4</sub>                                 | 0.15<br>(0.3 mA cm <sup>-2</sup> )            | 255<br>(0.51 mA h cm <sup>-2</sup> )             |
| <b>This work</b>                                     | <b>2 M ZnSO<sub>4</sub> + 0.2 M MnSO<sub>4</sub></b>                            | <b>0.05</b><br><b>(53 mA cm<sup>-2</sup>)</b> | <b>815</b><br><b>(0.84 mA h cm<sup>-2</sup>)</b> |

**Table S1.** the comparison of electrochemical properties between the proposed battery and the recently reported data about aqueous Zn<sup>2+</sup> battery. (the area-specific capacity is calculated according to the mass loading per unit area provided in the article)

## References

- [1] J. Huang, Z. Wang, M. Hou, X. Dong, Y. Liu, Y. Wang, Y. Xia, *Nat. Commun.*, 2018, 9, 1-8.
- [2] A. Huang, J. Chen, W. Zhou, A. Wang, M. Chen, Q. Tian, J. Xu, *J. Electroanal. Chem.*, 2020, 873, 114392.
- [3] Y. Zhang, S. Deng, Y. Li, B. Liu, G. Pan, Q. Liu, X. Wang, X. Xia, J. Tu, *Energy Storage Mater.*, 2020, 29, 52-59.
- [4] L. Wang, X. Cao, L. Xu, J. Chen, J. Zheng, *ACS Sustain. Chem. Eng.*, 2018, 6, 16055-16063.
- [5] B. Wu, G. Zhang, M. Yan, T. Xiong, P. He, L. He, X. Xu, L. Mai, *Small*, 2018, 14, 1703850.
- [6] D. Wang, L. Wang, G. Liang, H. Li, Z. Liu, Z. Tang, J. Liang, C. Zhi, *ACS nano*, 2019, 13, 10643-10652.
- [7] N. Wang, G. Yang, Y. Gan, H. Wan, X. Chen, C. Wang, Q. Tan, J. Ji, X. Zhao, P. Liu, *Front. chem.*, 2020, 8.
- [8] M. Liu, Q. Zhao, H. Liu, J. Yang, X. Chen, L. Yang, Y. Cui, W. Huang, W. Zhao, A. Song, *Nano Energy*, 2019, 64, 103942.
- [9] W. Liu, X. Zhang, Y. Huang, B. Jiang, Z. Chang, C. Xu, F. Kang, *J. Energy Chem.*, 2021, 56, 365-373.
- [10] Q. Zhao, X. Huang, M. Zhou, Z. Ju, X. Sun, Y. Sun, Z. Huang, H. Li, T. Ma, *ACS Appl Mater. Inter.*, 2020, 12, 36072-36081.
- [11] M. Han, J. Huang, S. Liang, L. Shan, X. Xie, Z. Yi, Y. Wang, S. Guo, J. Zhou, *Iscience*, 2020, 23, 100797.
- [12] J. Wang, X. Sun, H. Zhao, L. Xu, J. Xia, M. Luo, Y. Yang, Y. Du, *J. Phys. Chem. C*, 2019, 123, 22735-22741.
